# Supplementary material
Source: MDPI journal article supplement (https://www.mdpi.com/2073-4395/13/4/1090)
Supplement: s1 [file s1]

## Supplementary Materials

**Table S1.** Weather conditions from 2019 to 2021. The meteorological data of 2019–2021 came from Weather Underground (<https://www.wunderground.com>).

| Growing period | Mean temperature(°C) | Growing degree days | Precipitation(mm) |
|----------------|----------------------|---------------------|-------------------|
| 2019           |                      |                     |                   |
| April          | 14.7                 | 145                 | 42                |
| May            | 21.7                 | 364                 | 40                |
| June           | 26.0                 | 479                 | 15                |
| July           | 27.5                 | 542.5               | 105               |
| August         | 25.7                 | 486                 | 55                |
| September      | 23.3                 | 398                 | 47                |
| October        | 13.7                 | 119.5               | 22                |
| Average/Total  | 21.8                 | 2534                | 326               |
| 2020           |                      |                     |                   |
| April          | 14.9                 | 149                 | 28                |
| May            | 21.0                 | 342.5               | 36                |
| June           | 26.6                 | 499                 | 20                |
| July           | 26.2                 | 501                 | 98                |
| August         | 26.0                 | 497                 | 114               |
| September      | 22.0                 | 360                 | 42                |
| October        | 13.7                 | 114.5               | 0                 |
| Average/Total  | 21.5                 | 2463.0              | 338               |
| 2021           |                      |                     |                   |
| April          | 14.5                 | 134                 | 5                 |
| May            | 20.1                 | 314                 | 14                |
| June           | 25.1                 | 452.5               | 61                |
| July           | 26.5                 | 512.5               | 334               |
| August         | 25.5                 | 480                 | 92                |
| September      | 21.7                 | 351.5               | 151               |
| October        | 12.2                 | 92                  | 38                |
| Average/Total  | 20.8                 | 2336.5              | 695               |

**Table S2.** Qualitative information on the analyzed monoterpene contents in grape samples. a: "NIST" means identification of compounds based on mass spectra, "RI" indicates compound identification based on retention index, and "St" indicates compound identification against standards; b: Retention indices were calculated under HP-INNOWAX polar column conditions.

| Code | Compound                | CAS No.    | Ion for quantification (m/z) | Standard compounds  | Basis of qualitative analysis <sup>a</sup> | RI <sup>b</sup> | Standard curve y=ax+b |         |                |
|------|-------------------------|------------|------------------------------|---------------------|--------------------------------------------|-----------------|-----------------------|---------|----------------|
|      |                         |            |                              |                     |                                            |                 | a                     | b       | R <sup>2</sup> |
| M1   | <i>β</i> -Myrcene       | 123-35-3   | 93                           | <i>β</i> -Myrcene   | NIST, St, RI                               | 1172.6          | 3539.9                | 9.9197  | 0.9908         |
| M2   | D-Limonene              | 5989-27-5  | 68                           | Limonene            | NIST, St, RI                               | 1210.1          | 1571.9                | -41.009 | 0.9835         |
| M3   | Phellandrene            | 555-10-2   | 93                           | Phellandrene        | NIST, St, RI                               | 1220            | 3512.8                | 23.228  | 0.999          |
| M4   | <i>β</i> -trans-Ocimene | 3779-61-1  | 93                           | <i>β</i> -Myrcene   | NIST, RI                                   | 1244.3          | 3539.9                | 9.9197  | 0.9908         |
| M5   | <i>γ</i> -Terpinene     | 99-85-4    | 93                           | <i>γ</i> -Terpinene | NIST, St, RI                               | 1256            | 6059.9                | 7.4733  | 0.9966         |
| M6   | <i>β</i> -cis-Ocimene   | 3338-55-4  | 93                           | <i>β</i> -Myrcene   | NIST, RI                                   | 1261.9          | 3539.9                | 9.9197  | 0.9908         |
| M7   | Terpinolene             | 586-62-9   | 93                           | Terpinolene         | NIST, St, RI                               | 1294.2          | 27163                 | 266.95  | 0.9973         |
| M8   | <i>cis</i> -Rose oxide  | 16409-43-1 | 139                          | Rose oxide          | NIST, St, RI                               | 1363.1          | 1635.5                | 32.679  | 0.9953         |

|     |                                      |            |     |                      |              |        |        |        |        |
|-----|--------------------------------------|------------|-----|----------------------|--------------|--------|--------|--------|--------|
| M9  | <i>trans</i> -Rose oxide             | 876-18-6   | 139 | Rose oxide           | NIST, St, RI | 1378.1 | 1635.5 | 32.679 | 0.9953 |
| M10 | ( <i>E,Z</i> )- <i>Allo</i> -Ocimene | 7216-56-0  | 121 | $\beta$ -Myrcene     | NIST, RI     | 1383   | 3167.4 | 12.384 | 0.9911 |
| M11 | <i>Allo</i> -Ocimene                 | 673-84-7   | 121 | $\beta$ -Myrcene     | NIST, RI     | 1408.5 | 3167.4 | 12.384 | 0.9911 |
| M12 | <i>cis</i> -Furan linalool oxide     | 5989-33-3  | 59  | Linalool oxide       | NIST, St, RI | 1450.9 | 3320   | 23.157 | 0.9909 |
| M13 | <i>trans</i> -Furan linalool oxide   | 34995-77-2 | 59  | Linalool oxide       | NIST, St, RI | 1479.4 | 3320   | 23.157 | 0.9909 |
| M14 | Nerol oxide                          | 1786-08-9  | 68  | Rose oxide           | NIST, RI     | 1480.3 | 1635.5 | 32.679 | 0.9953 |
| M15 | Linalool                             | 78-70-6    | 71  | Linalool             | NIST, St, RI | 1551.9 | 991.64 | 534.04 | 0.9967 |
| M16 | 4-Terpineol                          | 562-74-3   | 71  | 4-Terpineol          | NIST, St, RI | 1605.6 | 755.58 | 8.2651 | 0.9933 |
| M17 | Hotrienol                            | 29957-43-5 | 71  | Linalool             | NIST, RI     | 1614.1 | 1033.2 | 254.45 | 0.9921 |
| M18 | Neral                                | 106-26-3   | 69  | Citral               | NIST, St, RI | 1691.5 | 1698.7 | 21.529 | 0.9842 |
| M19 | $\alpha$ -Terpineol                  | 98-55-5    | 59  | $\alpha$ -Terpineol  | NIST, St, RI | 1702.3 | 913.47 | 44.256 | 0.9912 |
| M20 | Geranial                             | 141-27-5   | 69  | Citral               | NIST, St, RI | 1741.7 | 1698.7 | 21.529 | 0.9842 |
| M21 | $\beta$ -Citronellol                 | 106-22-9   | 69  | $\beta$ -Citronellol | NIST, St, RI | 1766.8 | 875.25 | 16.859 | 0.982  |
| M22 | Nerol                                | 106-25-2   | 69  | Nerol                | NIST, St, RI | 1802.1 | 585.09 | 28.403 | 0.9929 |
| M23 | Geraniol                             | 106-24-1   | 69  | Geraniol             | NIST, St, RI | 1849.5 | 524.94 | 77.995 | 0.9915 |
| M24 | Geranic acid                         | 459-80-3   | 69  | Geranic acid         | NIST, St, RI | 2326.4 | 2194.6 | 1824.2 | 0.9478 |

**Table S3.** Effects of trellis systems on the phenology of 3 cultivars from 2019 to 2021

| Year | Cultivar | Treatment | Budbreak | Flowering<br>begins | Veraison | Cane maturing |
|------|----------|-----------|----------|---------------------|----------|---------------|
| 2019 | RDHY     | T         | Apr. 12  | May. 16             | Jul. 2   | Aug. 1        |
|      |          | V         | Apr. 16  | May. 17             | Jul. 2   | Aug. 2        |
|      | RDXY     | T         | Apr. 17  | May. 16             | Jul. 8   | Aug. 10       |
|      |          | V         | Apr. 18  | May. 16             | Jul. 12  | Aug. 12       |
|      | RG       | T         | Apr. 22  | May. 22             | Jul. 26  | Aug. 10       |
|      |          | V         | Apr. 22  | May. 21             | Jul. 27  | Aug. 9        |
| 2020 | RDHY     | T         | Apr. 13  | May. 20             | Jun. 29  | Aug. 1        |
|      |          | V         | Apr. 12  | May. 20             | Jun. 28  | Jul. 28       |
|      | RDXY     | T         | Apr. 13  | May. 23             | Jul. 15  | Aug. 8        |
|      |          | V         | Apr. 13  | May. 22             | Jul. 15  | Aug. 8        |
|      | RG       | T         | Apr. 23  | May. 26             | Aug. 2   | Aug. 5        |
|      |          | V         | Apr. 23  | May. 28             | Aug. 2   | Aug. 7        |
| 2021 | RDHY     | T         | Apr. 12  | May. 19             | Jun. 25  | Aug. 3        |
|      |          | V         | Apr. 13  | May. 20             | Jun. 25  | Aug. 3        |
|      | RDXY     | T         | Apr. 13  | May. 21             | Jul. 15  | Aug. 8        |
|      |          | V         | Apr. 15  | May. 22             | Jul. 16  | Aug. 10       |
|      | RG       | T         | Apr. 25  | May. 27             | Aug. 4   | Aug. 6        |
|      |          | V         | Apr. 24  | May. 27             | Aug. 3   | Aug. 6        |

Note: RDHY, 'RuiduHongyu'; RDXY, 'RuiduXiangyu'; RG, 'Red Globe'; T, the T trellis system; V, the V trellis system.

**Table S4.** Effects of trellis systems on the monoterpene contents in 3 table grape cultivars ( $\mu\text{g}\cdot\text{L}^{-1}$ ). Data are the mean of three replications. Two-way analysis of variance (ANOVA) was conducted (Treatment  $\times$  Cultivar). Within the same row and factor, different letters stand for the significant difference ( $p$  value  $< 0.05$ ) according to the Student-Newman-Keuls test. Significant differences are indicated: \*,  $p$  value  $< 0.05$ ; \*\*,  $p$  value  $< 0.01$ ; \*\*\*,  $p$  value  $< 0.001$ , ns, not significant. 'nd' represents not determined.

| Code | Compound | Cultivar | Treatment |
|------|----------|----------|-----------|
|------|----------|----------|-----------|

|     |                               |      | T         | V         | Treatment<br><i>p</i> value | Cultivar <i>p</i><br>value | Treatment<br>×Cultivar <i>p</i><br>value |
|-----|-------------------------------|------|-----------|-----------|-----------------------------|----------------------------|------------------------------------------|
| M1  | $\beta$ -Myrcene              | RDHY | 428.58 a  | 206.28 b  | 0.344                       | < 0.001                    | 0.009                                    |
|     |                               | RDXY | 479.08 a  | 592.63 a  |                             |                            |                                          |
|     |                               | RG   | nd        | nd        |                             |                            |                                          |
| M2  | Limonene                      | RDHY | 29.46 ab  | 5.21 b    | 0.802                       | 0.005                      | 0.218                                    |
|     |                               | RDXY | 36.74 a   | 54.01 a   |                             |                            |                                          |
|     |                               | RG   | nd        | nd        |                             |                            |                                          |
| M3  | Phellandrene                  | RDHY | 29.13 b   | 26.19 b   | 0.609                       | < 0.001                    | 0.517                                    |
|     |                               | RDXY | 67.46 a   | 78.30 a   |                             |                            |                                          |
|     |                               | RG   | nd        | nd        |                             |                            |                                          |
| M4  | $\beta$ -trans-Ocimene        | RDHY | 135.85 ab | 71.72 b   | 0.036                       | < 0.001                    | 0.274                                    |
|     |                               | RDXY | 161.15 a  | 82.47 b   |                             |                            |                                          |
|     |                               | RG   | nd        | nd        |                             |                            |                                          |
| M5  | $\gamma$ -Terpinen            | RDHY | 45.56 b   | 30.47 b   | 0.145                       | 0.003                      | 0.055                                    |
|     |                               | RDXY | 55.49 b   | 167.24 a  |                             |                            |                                          |
|     |                               | RG   | nd        | nd        |                             |                            |                                          |
| M6  | $\beta$ -cis-Ocimene          | RDHY | 196.63 a  | 93.92 b   | 0.132                       | < 0.001                    | 0.303                                    |
|     |                               | RDXY | 238.66 a  | 211.87 a  |                             |                            |                                          |
|     |                               | RG   | nd        | nd        |                             |                            |                                          |
| M7  | Terpinolen                    | RDHY | 353.44 b  | 315.34 c  | 0.097                       | < 0.001                    | 0.027                                    |
|     |                               | RDXY | 377.32 a  | 382.39 a  |                             |                            |                                          |
|     |                               | RG   | nd        | nd        |                             |                            |                                          |
| M8  | cis-Rose oxide                | RDHY | 53.25 bc  | 51.80 c   | 0.395                       | < 0.001                    | 0.148                                    |
|     |                               | RDXY | 57.58 b   | 62.35 a   |                             |                            |                                          |
|     |                               | RG   | nd        | nd        |                             |                            |                                          |
| M9  | trans-Rose oxide              | RDHY | 38.20 a   | 38.19 a   | 0.105                       | < 0.001                    | 0.080                                    |
|     |                               | RDXY | 37.20 b   | 38.48 a   |                             |                            |                                          |
|     |                               | RG   | nd        | nd        |                             |                            |                                          |
| M10 | Allo-ocimene                  | RDHY | 37.54 ab  | 25.11 b   | 0.641                       | < 0.001                    | 0.117                                    |
|     |                               | RDXY | 39.63 ab  | 46.92 a   |                             |                            |                                          |
|     |                               | RG   | nd        | nd        |                             |                            |                                          |
| M11 | (E,Z)-Allo-ocimene            | RDHY | 28.53 ab  | 20.55 b   | 0.702                       | < 0.001                    | 0.133                                    |
|     |                               | RDXY | 30.21 ab  | 35.30 a   |                             |                            |                                          |
|     |                               | RG   | nd        | nd        |                             |                            |                                          |
| M12 | cis-Furan linalool oxide      | RDHY | 110.50 c  | 49.73 d   | < 0.001                     | < 0.001                    | 0.004                                    |
|     |                               | RDXY | 369.34 a  | 292.10 b  |                             |                            |                                          |
|     |                               | RG   | nd        | nd        |                             |                            |                                          |
| M13 | trans-Furan linalool<br>oxide | RDHY | 55.11 a   | 34.03 b   | < 0.001                     | < 0.001                    | < 0.001                                  |
|     |                               | RDXY | 54.12 a   | 52.61 a   |                             |                            |                                          |
|     |                               | RG   | nd        | nd        |                             |                            |                                          |
| M14 | Nerol oxide                   | RDHY | 47.73 b   | 44.13 b   | 0.259                       | < 0.001                    | 0.563                                    |
|     |                               | RDXY | 58.41 a   | 57.17 a   |                             |                            |                                          |
|     |                               | RG   | nd        | nd        |                             |                            |                                          |
| M15 | Linalool                      | RDHY | 4930.84 a | 2308.14 d | < 0.001                     | < 0.001                    | < 0.001                                  |
|     |                               | RDXY | 3940.29 b | 3330.80 c |                             |                            |                                          |
|     |                               | RG   | 535.41 e  | 537.27 e  |                             |                            |                                          |
| M16 | hortrineol                    | RDHY | 448.06 a  | 354.12 b  | < 0.001                     | < 0.001                    | 0.002                                    |
|     |                               | RDXY | 340.76 bc | 309.60 c  |                             |                            |                                          |
|     |                               | RG   | nd        | nd        |                             |                            |                                          |
| M17 | 4-Terpineol                   | RDHY | 10.18 a   | 9.11 b    | 0.060                       | < 0.001                    | 0.062                                    |
|     |                               | RDXY | 9.42 b    | 9.34 b    |                             |                            |                                          |
|     |                               | RG   | nd        | nd        |                             |                            |                                          |
| M18 | Neral                         | RDHY | nd        | nd        | \                           | \                          | \                                        |
|     |                               | RDXY | nd        | nd        |                             |                            |                                          |
|     |                               | RG   | nd        | nd        |                             |                            |                                          |
| M19 | $\alpha$ -Terpineol           | RDHY | 90.79 a   | 66.53 b   | 0.027                       | < 0.001                    | 0.053                                    |
|     |                               | RDXY | 98.31 a   | 93.74 a   |                             |                            |                                          |
|     |                               | RG   | nd        | nd        |                             |                            |                                          |
| M20 | Geranial                      | RDHY | 24.44     | 24.64     | 0.691                       | < 0.001                    | 0.954                                    |
|     |                               | RDXY | 24.84     | 25.16     |                             |                            |                                          |
|     |                               | RG   | nd        | nd        |                             |                            |                                          |

|     |                      |      |                        |                        |         |         |         |
|-----|----------------------|------|------------------------|------------------------|---------|---------|---------|
| M21 | $\beta$ -Citronellol | RDHY | 21.53 c                | 22.36 bc               | 0.084   | < 0.001 | 0.209   |
|     |                      | RDXY | 27.88 b                | 31.02 a                |         |         |         |
|     |                      | RG   | nd                     | nd                     |         |         |         |
| M22 | Nerol                | RDHY | 38.56 b                | 37.62 b                | 0.642   | < 0.001 | 0.862   |
|     |                      | RDXY | 44.38 a                | 44.24 a                |         |         |         |
|     |                      | RG   | nd                     | nd                     |         |         |         |
| M23 | Geraniol             | RDHY | 122.07                 | 128.19                 | 0.794   | < 0.001 | 0.301   |
|     |                      | RDXY | 126.26                 | 122.19                 |         |         |         |
|     |                      | RG   | nd                     | nd                     |         |         |         |
| M24 | Geranic acid         | RDHY | 1865.71 $\pm$ 4.30 b   | 1885.73 $\pm$ 4.11 b   | 0.874   | < 0.001 | 0.216   |
|     |                      | RDXY | 2087.56 $\pm$ 19.06 a  | 2071.58 $\pm$ 14.53 a  |         |         |         |
|     |                      | RG   | 1835.51 $\pm$ 2.17 bc  | 1827.45 $\pm$ 0.46 c   |         |         |         |
|     | Total                | RDHY | 9141.69 $\pm$ 179.99 a | 5849.10 $\pm$ 193.56 b | < 0.001 | < 0.001 | < 0.001 |
|     |                      | RDXY | 8762.09 $\pm$ 490.77 a | 8191.52 $\pm$ 329.92 a |         |         |         |
|     |                      | RG   | 2370.93 $\pm$ 3.09 c   | 2364.72 $\pm$ 0.36 c   |         |         |         |

---

Note: RDHY, 'RuiduHongyu'; RDXY, 'RuiduXiangyu'; RG, 'Red Globe'; T, the T trellis system; V, the V trellis system.
